# Supplementary material for: Probing the coupling between the components in a graphene–mesoporous germanium nanocomposite using high-pressure Raman spectroscopy
Source: Royal Society of Chemistry journal article supplement (doi:10.1039/d1na00123j), 2021-01-01
Supplement: d1na00123j1.pdf [file d1na00123j1.pdf]

## Supporting Information

### **Probing the coupling between the components in a graphene-mesoporous germanium nanocomposite using high-pressure Raman spectroscopy**

Denis Machon<sup>1,2,3,\*</sup>, Stéphanie Sauze<sup>1,2</sup>, Richard Arès<sup>1,2</sup>, Abderraouf Boucherif<sup>1,2</sup>

1. Institut Interdisciplinaire d'Innovation Technologique (3IT), Université de Sherbrooke, 3000 Boulevard Université, Sherbrooke, J1K OA5 Québec, Canada
2. Laboratoire Nanotechnologies et Nanosystèmes (LN2) - CNRS UMI-3463 Institut Interdisciplinaire d'Innovation Technologique (3IT), Université de Sherbrooke, 3000 Boulevard Université, Sherbrooke, J1K OA5 Québec, Canada
3. Univ Lyon, Université Claude Bernard Lyon 1, CNRS UMR 5306, Institut Lumière Matière, F-69622 Villeurbanne, France

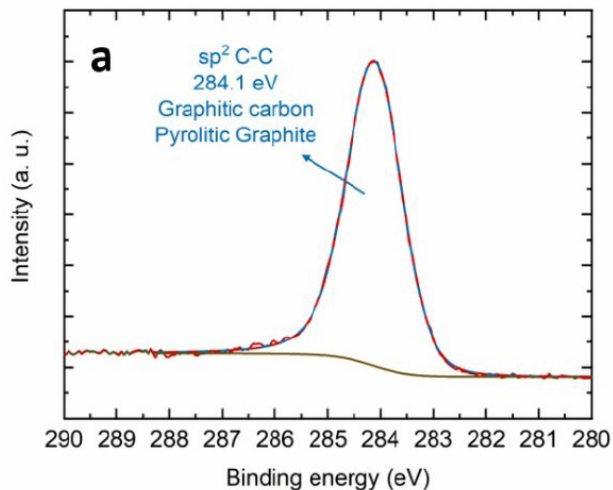

**Figure S1** – XPS spectra of the Graphene-mesoporous germanium nanocomposite.

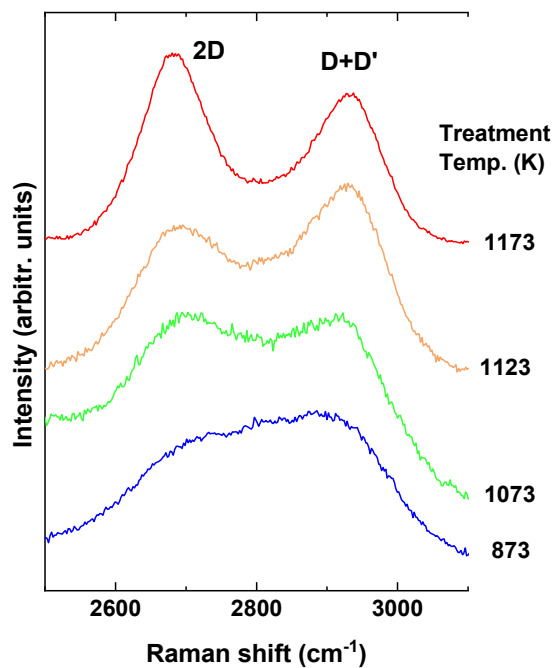

**Figure S2** – Raman spectra of the Gr-MP-Ge nanocomposite with different temperatures of treatment. The spectra show a zoom on of the 2D peak region. Additionally, the 2D peak region has a low intensity and a significant broadening for the sample treated at 873K. The shape is modified by a treatment involving a higher temperature with the appearance of marked 2D and D + D' peaks. These changes are due to the decrease of disorder with the increasing temperature.
